# Supplementary material for: Structure and superconductivity of LiFeAs
Source: Royal Society of Chemistry journal article supplement (doi:10.1039/b813153h), 2008-01-01

## Structure and superconductivity of LiFeAs

Michael J. Pitcher, Dinah R. Parker, Paul Adamson, Sebastian J. C. Herkelrath,  
 Andrew T. Boothroyd, Richard M. Ibberson, Michela Brunelli, and Simon J. Clarke

### B813153H Electronic Supplementary Information.

**Table S1.** Summary of joint refinement for LiFeAs Sample 2 against Powder Neutron Diffraction (PND) and Synchrotron X-ray diffraction data at 295 K and individual comparative refinements against PND data at 295 K and 6.5 K.

| Instrument                | Joint HRPD + ID31 | HRPD                    |            |
|---------------------------|-------------------|-------------------------|------------|
| Temperature / K           | 295               | 295                     | 6.5        |
| Space group               |                   | <i>P4/nmm</i> (No. 129) |            |
| <i>a</i> / Å              | 3.776360(4)       | 3.77543(3)              | 3.76982(4) |
| <i>c</i> / Å              | 6.35679(1)        | 6.35345(6)              | 6.30693(7) |
| <i>V</i> / Å <sup>3</sup> | 90.6536(2)        | 90.561(1)               | 89.631(2)  |
| <i>R</i> <sub>wp</sub>    | 0.0521            | 0.0389                  | 0.0304     |
| $\chi^2$                  | 10.07             | 7.035                   | 8.115      |

**Table S2.** Refined atomic parameters for LiFeAs Sample 2 at 295 K from joint refinement against PND and Synchrotron X-ray diffraction data.

| Atom | Site       | <i>x</i> | <i>y</i> | <i>z</i>   | <i>U</i> <sub>equiv</sub> / Å <sup>2</sup> × 100 | Refined fractional occupancy |
|------|------------|----------|----------|------------|--------------------------------------------------|------------------------------|
| Fe   | 2 <i>a</i> | 0.75     | 0.25     | 0          | 0.68(1)                                          | 1                            |
| Li   | 2 <i>c</i> | 0.25     | 0.25     | 0.6536(2)  | 1.78(5)                                          | 0.997(4)                     |
| As   | 2 <i>c</i> | 0.25     | 0.25     | 0.23715(3) | 0.74(1)                                          | 0.995(1)                     |

**Table S3.** Refined atomic parameters for LiFeAs Sample 2 at 295 K (upper) and 6.5 K (lower) obtained by refinement against PND data.

| Atom | Site       | <i>x</i> | <i>y</i> | <i>z</i>   | <i>U</i> <sub>equiv</sub> / Å <sup>2</sup> × 100 | Refined fractional occupancy |
|------|------------|----------|----------|------------|--------------------------------------------------|------------------------------|
| Fe   | 2 <i>a</i> | 0.75     | 0.25     | 0          | 0.66(1)                                          | 1                            |
|      |            |          |          |            | 0.18(1)                                          | 1                            |
| Li   | 2 <i>c</i> | 0.25     | 0.25     | 0.6538(1)  | 1.61(5)                                          | 0.963(4)                     |
|      |            |          |          | 0.6554(2)  | 0.77(6)                                          | 0.950(4)                     |
| As   | 2 <i>c</i> | 0.25     | 0.25     | 0.23685(4) | 0.62(2)                                          | 0.972(1)                     |
|      |            |          |          | 0.23646(5) | 0.12(1)                                          | 0.976(1)                     |

**Table S4.** Refined anisotropic displacement parameters for LiFeAs Sample 2 at 295 K from joint refinement against PND and Synchrotron X-ray diffraction data.

| Atom | $U_{11} = U_{22} / \text{\AA}^2 \times 100$ | $U_{33} / \text{\AA}^2 \times 100$ |
|------|---------------------------------------------|------------------------------------|
| Fe   | 0.609(6)                                    | 0.835(8)                           |
| Li   | 2.03(4)                                     | 1.29(6)                            |
| As   | 0.769(5)                                    | 0.673(8)                           |

**Table S5.** Refined anisotropic displacement parameters for LiFeAs Sample 2 at 295 K (upper) and 6.5 K (lower) obtained by refinement against PND data.

| Atom | $U_{11} = U_{22} / \text{\AA}^2 \times 100$ | $U_{33} / \text{\AA}^2 \times 100$ |
|------|---------------------------------------------|------------------------------------|
| Fe   | 0.580(8)<br>0.184(7)                        | 0.82(1)<br>0.177(9)                |
| Li   | 1.95(4)<br>0.90(4)                          | 0.94(6)<br>0.50(6)                 |
| As   | 0.535(9)<br>0.089(9)                        | 0.80(2)<br>0.18(1)                 |

**Table S6.** Summary of refinement for LiFeAs Sample 1 against Powder Neutron Diffraction (NPD) at 295 K on POLARIS

|                    |               |
|--------------------|---------------|
| Instrument         | POLARIS       |
| Temperature / K    | 295           |
| Space group        | <i>P4/nmm</i> |
| $a / \text{\AA}$   | 3.7773(7)     |
| $c / \text{\AA}$   | 6.3565(1)     |
| $V / \text{\AA}^3$ | 90.696(5)     |
| $R_{wp}$           | 0.0264        |
| $\chi^2$           | 0.7325        |

**Table S7.** Refined atomic parameters for LiFeAs Sample 1 at 295 K from POLARIS NPD data.

| Atom | Site | $x$  | $y$  | $z$        | $U_{\text{equiv}} / \text{\AA}^2 \times 100$ | Refined fractional occupancy |
|------|------|------|------|------------|----------------------------------------------|------------------------------|
| Fe   | 2a   | 0.75 | 0.25 | 0          | 0.65(2)                                      | 1                            |
| Li   | 2c   | 0.25 | 0.25 | 0.6551(4)  | 1.77(9)                                      | 0.99(1)                      |
| As   | 2c   | 0.25 | 0.25 | 0.23654(9) | 0.65(2)                                      | 0.977(3)                     |

**Table S8.** Refined anisotropic displacement parameters for LiFeAs Sample 1 at 295 K from POLARIS NPD data.

| Atom | $U_{11} = U_{22} / \text{\AA}^2 \times 100$ | $U_{33} / \text{\AA}^2 \times 100$ |
|------|---------------------------------------------|------------------------------------|
| Fe   | 0.66(1)                                     | 0.64(2)                            |
| Li   | 2.13(8)                                     | 1.1(1)                             |
| As   | 0.63(2)                                     | 0.70(3)                            |

**Table S9.** Refined bond lengths (Å) and angles (degrees) for LiFeAs: Sample 2 at 295 K and 6.5 K obtained by joint refinement against Powder Neutron Diffraction (PND) and Synchrotron X-ray diffraction data at 295 K from individual comparative refinements against PND data at 295 K and 6.5 K; Sample 1 at 295 K from POLARIS NPD data

|                        | Sample 2    |            |            | Sample 1      |
|------------------------|-------------|------------|------------|---------------|
|                        | Joint 295 K | HRPD 295 K | HRPD 6.5 K | POLARIS 295 K |
| Fe–As [4] <sup>a</sup> | 2.4162(1)   | 2.4141(2)  | 2.4035(2)  | 2.4141(3)     |
| Li–As [4]              | 2.7592(3)   | 2.7585(3)  | 2.7515(3)  | 2.7584(6)     |
| Li–As [1]              | 2.647(1)    | 2.6493(9)  | 2.642(1)   | 2.661(2)      |
| Fe–Fe [4]              | 2.67029(1)  | 2.66963(2) | 2.66566(3) | 2.67098(5)    |
| Li–Fe [4]              | 2.9008(8)   | 2.8984(7)  | 2.8767(8)  | 2.894(2)      |
| Li–Li [4]              | 3.308(1)    | 3.309(1)   | 3.309(1)   | 3.320(3)      |
|                        |             |            |            |               |
| As–Fe–As [4]           | 112.910(3)  | 112.865(5) | 112.643(6) | 112.83(1)     |
| As–Fe–As [2]           | 102.793(6)  | 102.88(1)  | 103.30(1)  | 102.95(2)     |
| As–Li–As [4]           | 104.58(2)   | 104.58(2)  | 104.35(2)  | 104.46(5)     |
| As–Li–As [4]           | 86.37(1)    | 86.37(1)   | 86.48(1)   | 86.43(3)      |

<sup>a</sup> The number in square brackets indicates the number of symmetry equivalent bond lengths and angles

**Figure S1.** Rietveld refinements for the joint PND and Synchrotron X-ray refinements on Sample 2 at 295 K.

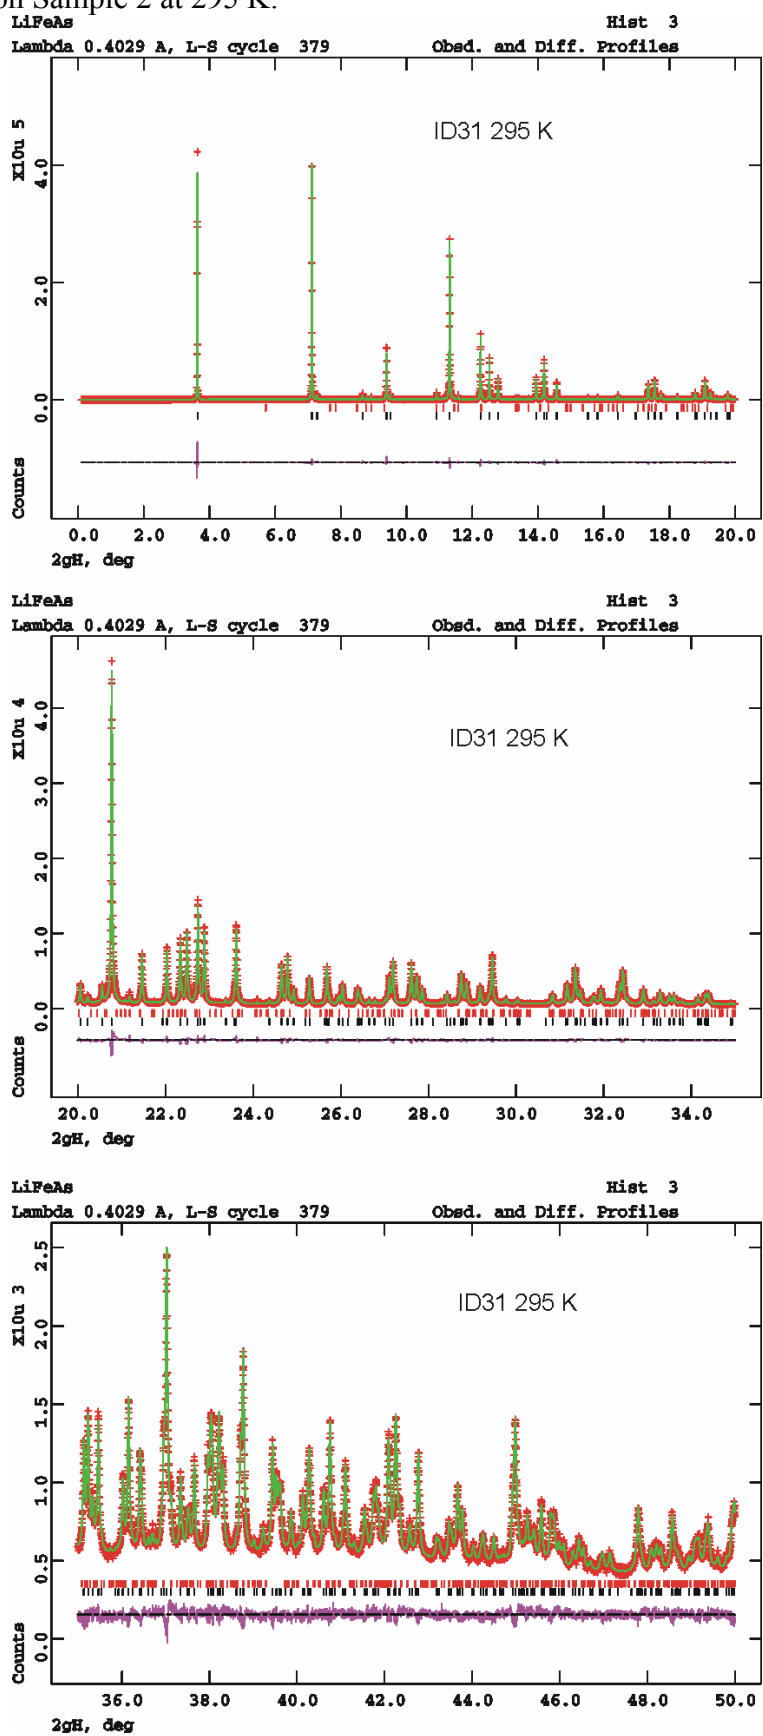

LiFeAs Hist 2  
Bank 2, 2-Theta 90.0, L-S cycle 379 Obsd. and Diff. Profiles

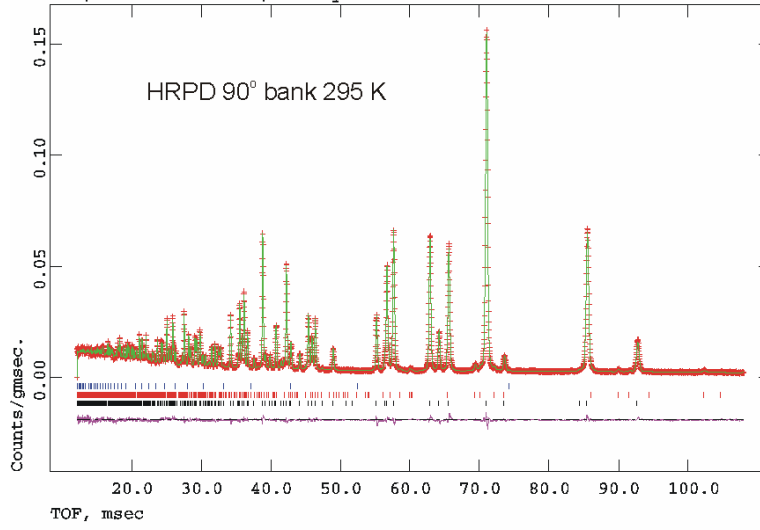

LiFeAs Hist 1  
Bank 1, 2-Theta 168.3, L-S cycle 379 Obsd. and Diff. Profiles

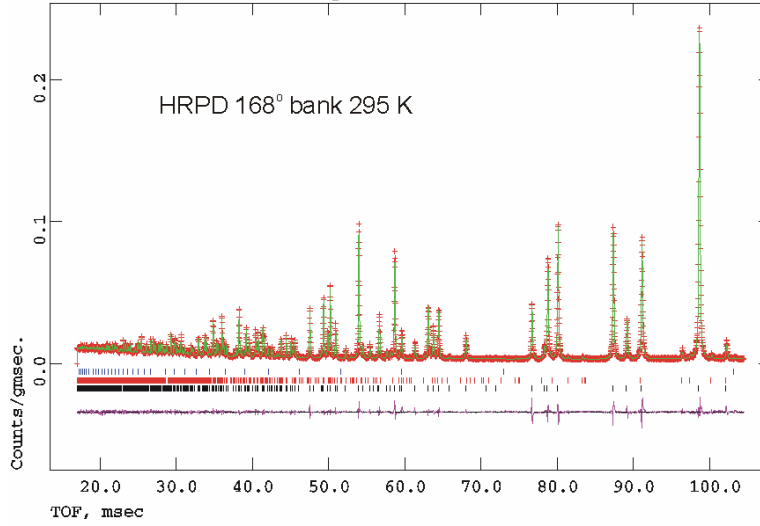

LiFeAs Hist 1  
Bank 1, 2-Theta 168.3, L-S cycle 379 Obsd. and Diff. Profiles

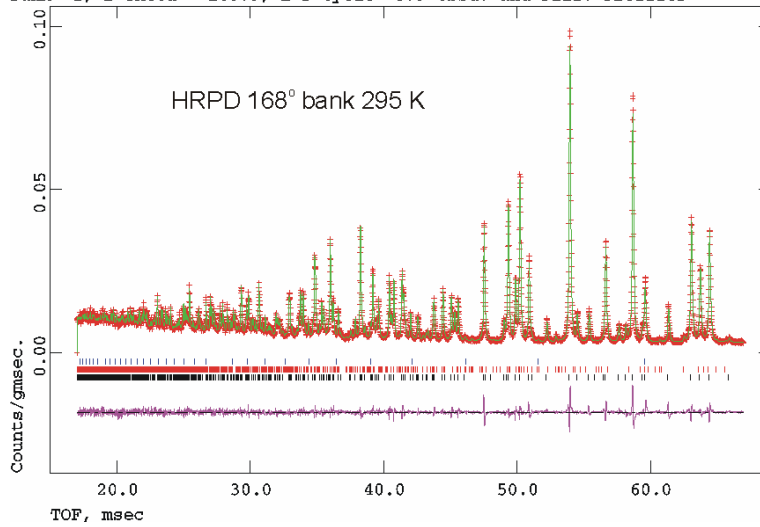

**Figure S2.** Rietveld refinements for the POLARIS NPD refinement on Sample 1 at 295 K.

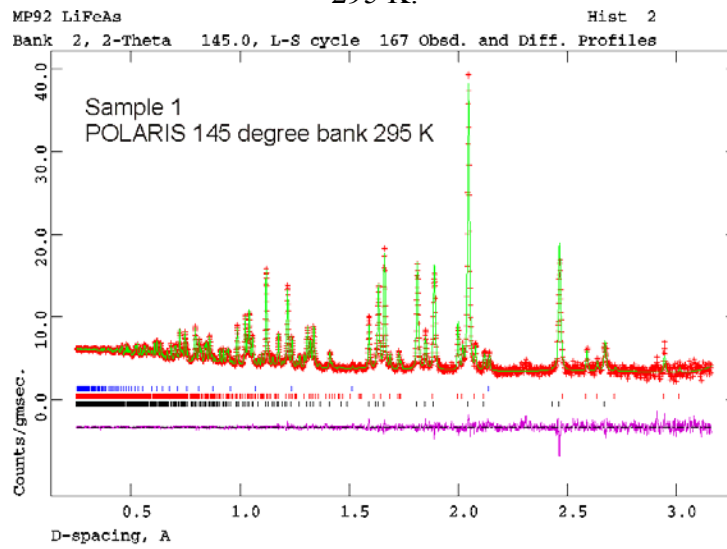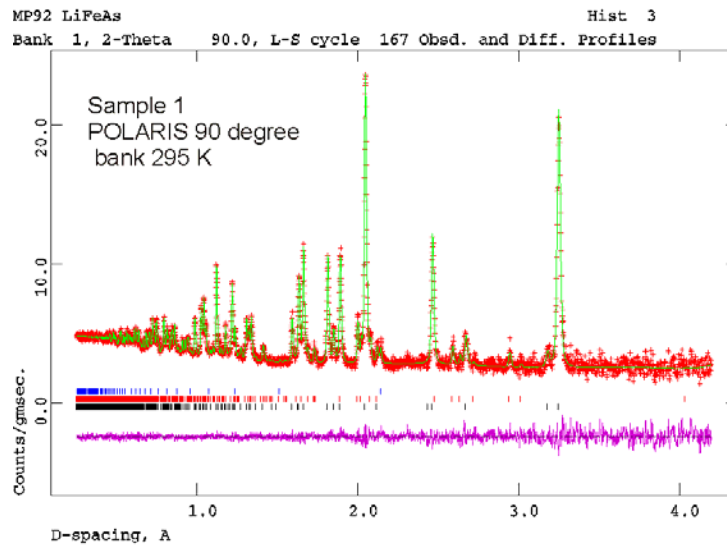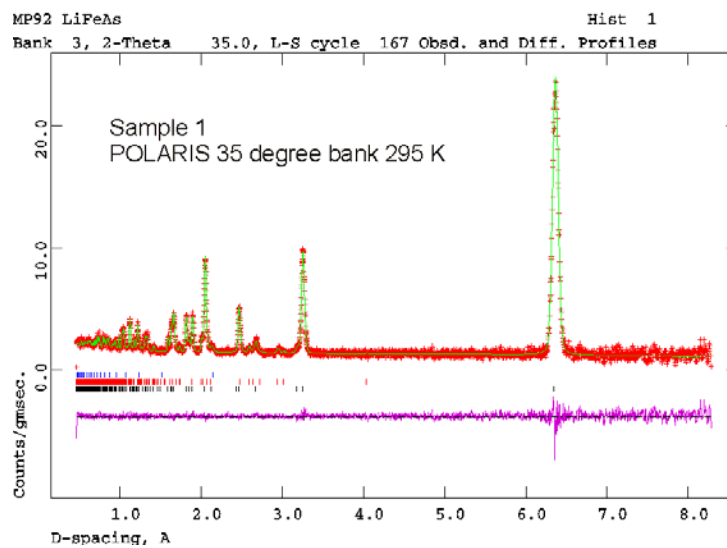

Supplement: b813153h.pdf [file b813153h.pdf]
